# Supplementary material
Source: publisher figshare collection journal article supplement (https://karger.figshare.com/ndownloader/files/22625879)
Supplement: Supplementary file 1 [file 22625879]

## Supplemental table 1 Point-prevalence of CKD according to the CKD-EPI and CAPA formulas at each follow-up visit

|  | CKD-EPIcysC | | |  | | CAPAcysC | | |
| --- | --- | --- | --- | --- | --- | --- | --- | --- |
|  | Age 75 | Age 80 | Age 85 |  | Age 75 | | Age 80 | Age 85 |
|  | N (%) | N (%) | N (%) |  | N (%) | | N (%) | N (%) |
| Stage 1 | 81 (8.3) | 6 (0.9) | 1 (0.3) |  | 81 (8.3) | | 14 (2.0) | 1 (0.3) |
| Stage 2 | 489 (49.8) | 230 (33.6) | 59 (16.2) |  | 556 (56.7) | | 302 (44.1) | 105 (28.8) |
| Stage 3a | 252 (25.7) | 265 (38.7) | 148 (40.5) |  | 234 (23.9) | | 262 (38.2) | 148 (40.5) |
| Stage 3b | 131 (13.4) | 148 (21.6) | 127 (34.8) |  | 91 (9.3) | | 88 (12.8) | 90 (24.7) |
| Stage 4-5 | 28 (2.9) | 36 (5.3) | 30 (8.2) |  | 19 (1.9) | | 19 (2.8) | 21 (5.8) |
| Stage 3-5 | 411 (42.0) | 449 (65.6) | 305 (83.5) |  | 344 (35.1) | | 369 (53.8) | 259 (71.0) |
